# Supplementary material for: Extracorporeal Membrane Oxygenation for Septic Shock in Adults and Children: A Narrative Review
Source: MDPI journal article supplement (doi:10.3390/jcm12206661), 2023-10-20
Supplement: s1 [file s1]

**Table S1. Table shows included articles with clinically related inclusion and outcome data**

| Author                      | Age group | N             | Mode                               | LVEF | SOFA                                                       | Weaned alive         | Survival to discharge              | Associations with death                               | Comment                                                                                                  |
|-----------------------------|-----------|---------------|------------------------------------|------|------------------------------------------------------------|----------------------|------------------------------------|-------------------------------------------------------|----------------------------------------------------------------------------------------------------------|
| Bréchet, et al. 2013 [18]   | Adult     | 14            | VA                                 | 16%  | 18                                                         | 84%                  | 71%                                | n/a                                                   | Femoro-femoral cannulation; SAPS-3: 84                                                                   |
| Bréchet, et al. 2020 [95]   | Adult     | 82 (5-center) | VA (VVA n=8)                       | 17%  | 17                                                         | 74%                  | 60%                                | n/a                                                   | Femoro-femoral, 13% CA before cannulation.                                                               |
| Falk, et al. 2019 [17]      | Adult     | 20            | VA (n=18), VV (n=2)                | 25%  | 16                                                         | 90% (VV 50%; VA 94%) | 75%                                | Need of VV to VA conversion; Number of organ failures | Jugulo-femoral VA, jugulo-femoral VV; 7 pt CA before ECMO, survival 71%; SAPS-3: 86 1 VV converted to VA |
|                             |           | 17            | VA (n=9), VV (n=8)                 | 52%  |                                                            | 65% (VV 62%, VA 67%) | 65%                                |                                                       | Jugulo-femoral VA, jugulo-femoral VV; 5 VV patients converted to VA.                                     |
| Huang, et al. 2013 [26]     | Adult     | 52            | VA                                 | >55% | 17                                                         | n/a                  | 15%                                | Age (all >60 years died n=20);                        | Peripheral femoro-femoral cannulation; 40% CA before ECMO start, 10% survival; no need of LV venting     |
| Park, et al. 2015 [27]      | Adult     | 32            | VA                                 | 25%  | 16                                                         | 41%                  | 22%*                               | Lactate, SOFA, troponinT, CA (HR 4.6), time to ECMO   | Femoro-femoral cannulation; 44% CA before ECMO start; SAPS-3: 79                                         |
| Vogel, et al. 2018 [52]     | Adult     | 12            | VVA                                | 16%  | 10                                                         | 75%                  | 75%                                | n/a                                                   | Femoro-femorofemoral cannulation; 42% CA before start; 1 pt needed IABP for LV unloading                 |
| MacLaren, et al (2007) [14] | Ped       | 45            | VA (central n=11, peripheral n=34) | n/a  | MAP 45 mmHg<br>PaO2/FiO2 ratio 64 mmHg; Lactate 8.1 mmol/L | n/a                  | 47%; (73% central, 44% peripheral) | Benefit for central cannulation                       | Jugulo-carotic, femoro-carotic, right atrium to aorta.                                                   |

|                                |          |      |                          |                          |                                                                                   |                                                                                                                                                                 |                      |                                                  |                                                                   |
|--------------------------------|----------|------|--------------------------|--------------------------|-----------------------------------------------------------------------------------|-----------------------------------------------------------------------------------------------------------------------------------------------------------------|----------------------|--------------------------------------------------|-------------------------------------------------------------------|
| MacLaren, et al (2011) [15]    | Ped      | 23   | VA (central)             | n/a                      | MAP 57 mmHg<br>PaO2/FiO2 ratio 99 mmHg; Lactate 7.5 mmol/L                        | 78%                                                                                                                                                             | 74%                  | High lactate before                              | 35% CA before ECMO                                                |
| Melnikov, et al. 2022 [13]     | Ped      | 31   | VA, VV                   | n/a                      | MAP 51 mmHg<br>PaO2/FiO2 ratio 48 mmHg<br>PIM2/3, 31.6 EMR%<br>Lactate 8.5 mmol/L | 71%                                                                                                                                                             | 68% (VA 62%, VV 80%) | High lactate and creatinine before               | Jugulo-femoral VA; juguloa-femoral VV; 29% CA before cannulation. |
| Ramanathan, et al. (2020) [45] | Ped/ Neo | 2559 | n/a                      | n/a                      | n/a                                                                               | Overall 59%; VA 65% (n=208); Ped 50% (n=138); Neonates 73% (n=85)                                                                                               | n/a                  | No variable predictive of mortality              | Review and meta-analysis                                          |
| Skinner, et al. (2012) [16]    | Ped/ Neo | 4332 | VA (n=3256), VV (n=1076) | non-cardiac septic shock | n/a                                                                               | Overall 68% (VA 64%, VV 79%); Ped 1 mth-12 yrs VV 54% (n=63); VA 37% (n=169); Ped >12 yrs VV 29% (n=9); VA 43% (n=25); Neonates VV 83% (n=777); VA 70% (n=1892) | n/a                  | VA (odds ratio, 2.06; 95% CI, 1.74-2.44; p<0.001 | ELSO Registry study                                               |

**Abbreviations:** CA, cardiac arrest; CI, confidence interval; ECMO, extracorporeal membrane oxygenation; ELSO, Extracorporela Life Support Organization; EMR%, estimated mortality rate (in percent); LV, left cardiac ventricle; LVEF, left ventricular ejection fraction; MAP, mean arterialblood pressure; N, total number; Neo, neonate; Ped, pediatric; PIM, Pediatric Index of Mortality; SAPS-3, Simplified Acute Physiology Score; SOFA, Sequential Organ Failure Assessment; VA, veno-arterial; VV, veno-venous; VVA, veno-venoarterial
